# Supplementary material for: Emergence of topological nodal loops in alkaline-earth hexaborides XB6(X = Ca, Sr, and Ba) under pressure
Source: Royal Society of Chemistry journal article supplement (doi:10.1039/c6cp08421d), 2017-01-01
Supplement: c6cp08421d1.pdf [file c6cp08421d1.pdf]

Supplementary Information for  
**Emergence of Topological Nodal Loops in Alkaline-Earth  
Hexaborides  $XB_6$  ( $X=Ca, Sr, Ba$ ) under Pressure**

L.-Y. Gan,<sup>1,2</sup> R. Wang,<sup>1,3</sup> Y. J. Jin,<sup>1</sup> D. B. Ling,<sup>4</sup> J. Z. Zhao,<sup>1</sup> W. P. Xu,<sup>1</sup> J. F. Liu,<sup>1,\*</sup> and H. Xu<sup>1,†</sup>

<sup>1</sup>*Department of Physics, South University of Science and Technology of China, Shenzhen 518055, China*

<sup>2</sup>*Key Laboratory of Advanced Technology of Materials (Ministry of Education), Superconductivity and New Energy R&D Center, Southwest Jiaotong University, Chengdu, 610031 Sichuan, China*

<sup>3</sup>*Institute for Structure and Function & Department of Physics, Chongqing University, 400030 Chongqing, China*

<sup>4</sup>*Department of Physics, Anhui University, Hefei 230601, China*

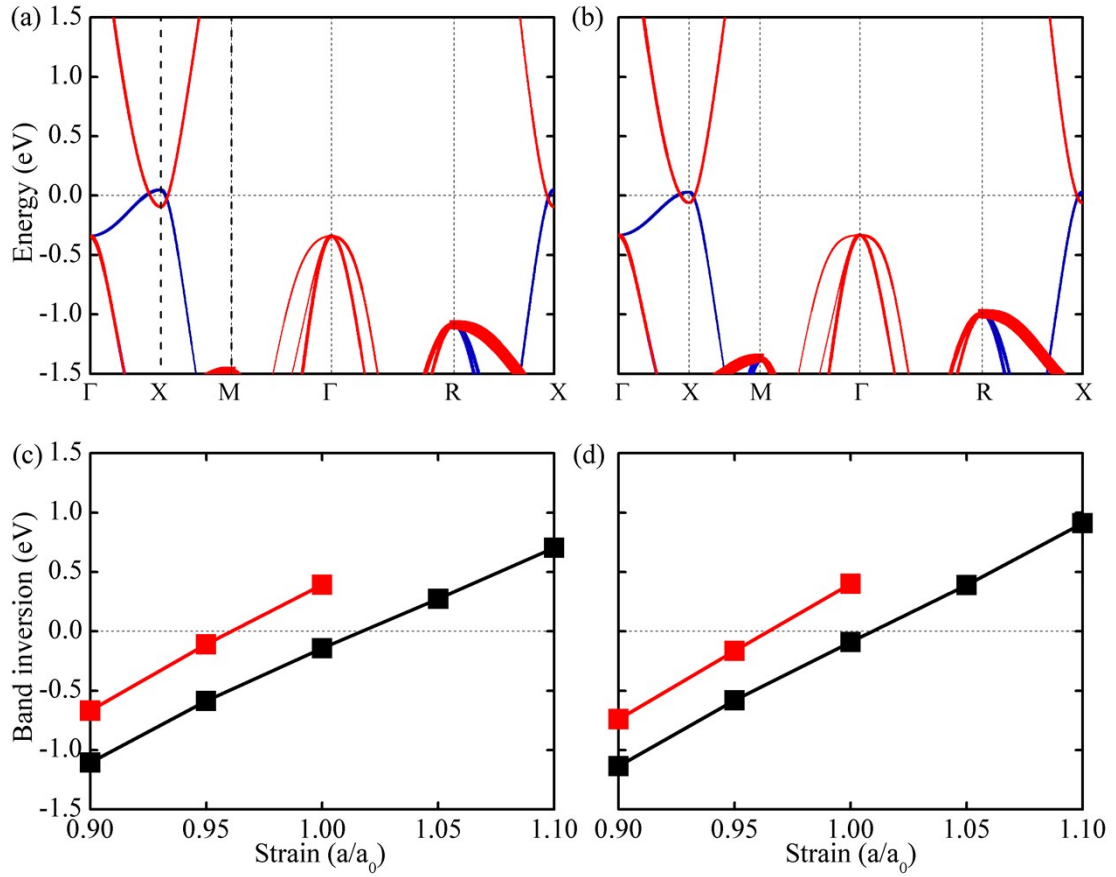

FIG. S1. (Color online) Projected band structures of (a) CaB<sub>6</sub> and (b) SrB<sub>6</sub> from GGA-PBE without SOC. The blue and red color show B  $p_x$  ( $p_z$ ) and  $p_y$  orbitals, respectively. Evolution of the band inversion between the bonding and anti-bonding bands at X point of (c) CaB<sub>6</sub> and (d) SrB<sub>6</sub>. Negative values indicate the existence of band inversion. Black: GGA-PBE. Red: HSE06.

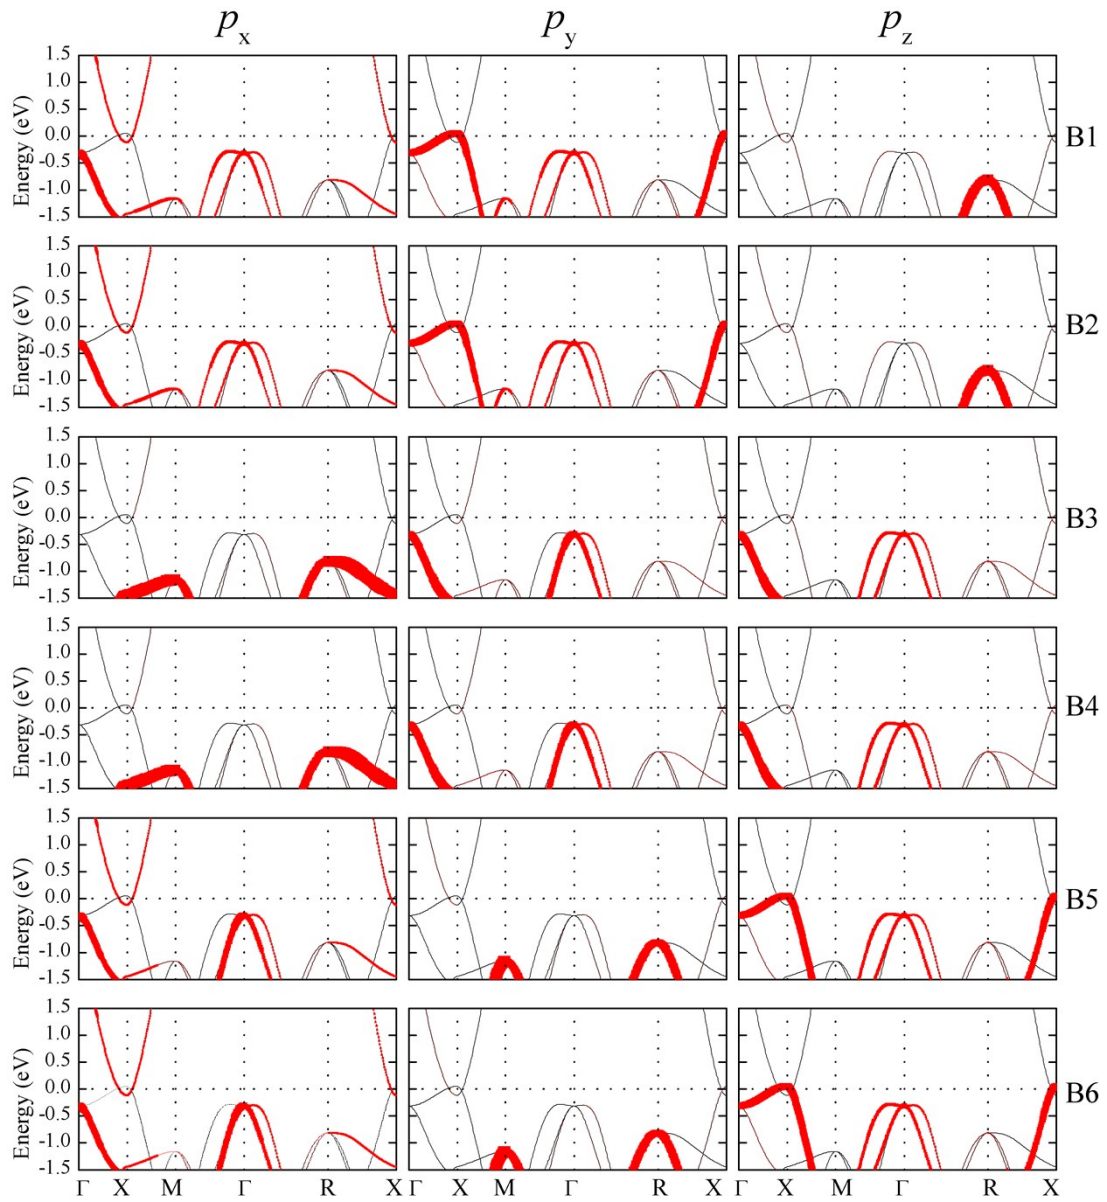

FIG. S2. (Color online) Projected band structures of B  $p$  orbitals.

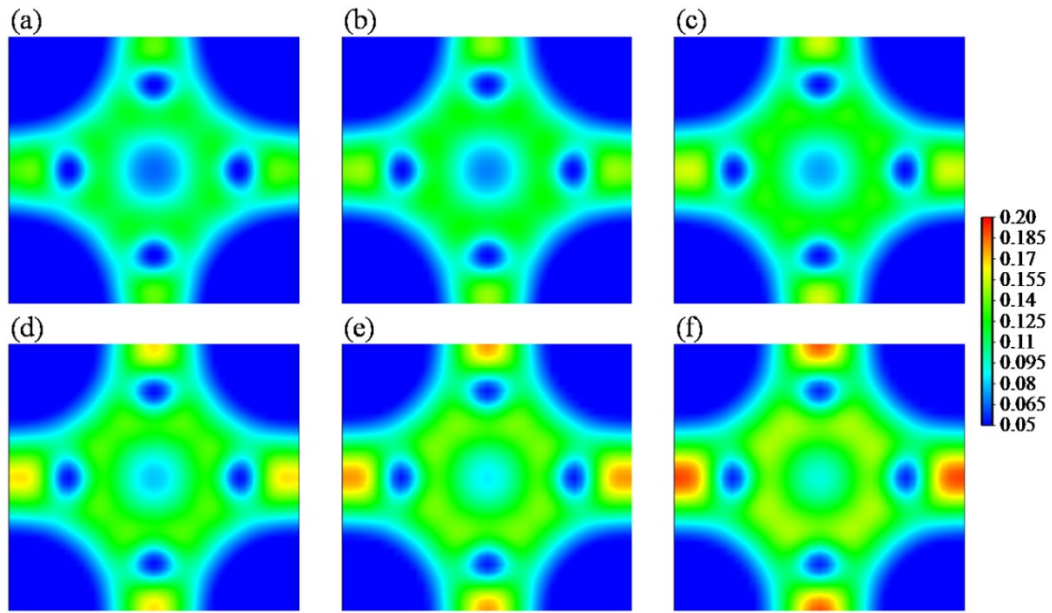

FIG. S3. (Color online) Charge density contours of the (001) plane formed by B3-B6 atoms as shown in Fig. 1a: (a) unstrained; (b)-(f) strained systems at a strain of 0.98, 0.96, 0.94, 0.92, and 0.90, respectively.

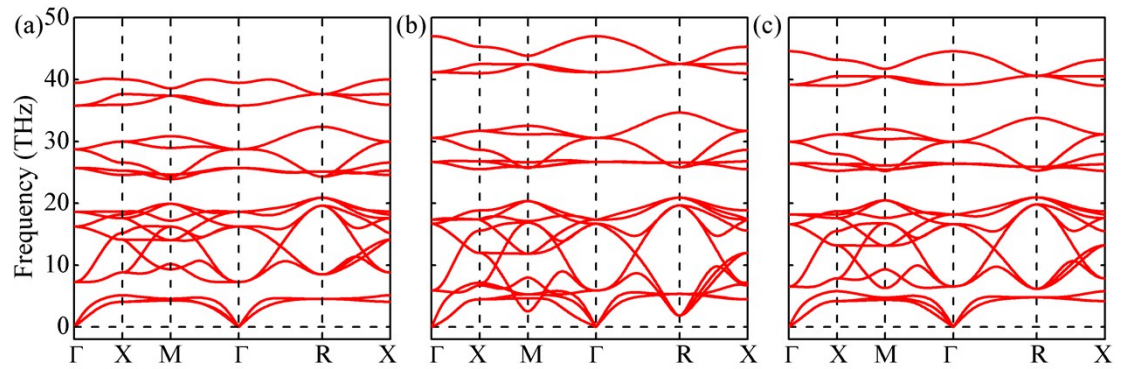

FIG. S4. (Color online) Phonon band dispersions of (a)  $\text{BaB}_6$ , (b)  $\text{CaB}_6$ , and (c)  $\text{SrB}_6$  at the strain of 0.95.
